# Supplementary material for: Mechanisms of PDZ domain scaffold assembly illuminated by use of supported cell membrane sheets
Source: eLife journal article supplement (doi:10.7554/elife.39180), 2019-01-03
Supplement: supp [file elife-39180-supp-v1.zip]

Archive with 11 entries (11 files):
- elife_poa_e39180_Figure_5_figure_supplement_3.eps
- elife_poa_e39180_Figure_5_figure_supplement_2.ai
- elife_poa_e39180_Figure_2_figure_supplement_1.ai
- elife_poa_e39180_Figure_4_figure_supplement_3.ai
- elife_poa_e39180_Transparent_Reporting_File.pdf
- elife_poa_e39180_Figure_2_figure_supplement_3.ai
- elife_poa_e39180_Figure_2_figure_supplement_2.ai
- elife_poa_e39180_Figure_3_figure_supplement_1.eps
- elife_poa_e39180_Figure_4_figure_supplement_1.ai
- elife_poa_e39180_Figure_5_figure_supplement_1.ai
- elife_poa_e39180_Figure_4_figure_supplement_2.ai
